# Supplementary material for: Sustainable cannabinoids purification through twin-column recycling chromatography and green solvents
Source: PubMed Central journal article supplement (PMC11249647; doi:10.1007/s00216-024-05332-7), 2024-05-15
Supplement: 216_2024_5332_MOESM1_ESM.pdf [file 216_2024_5332_MOESM1_ESM.pdf]

# SUPPLEMENTARY MATERIAL

001  
002  
003  
004  
005  
006  
007  
008  
009  
010  
011  
012  
013  
014  
015  
016  
017  
018  
019  
020  
021  
022  
023  
024  
025  
026  
027  
028  
029  
030  
031  
032  
033  
034  
035  
036  
037  
038  
039  
040  
041  
042  
043  
044  
045  
046

|     |                                 |          |
|-----|---------------------------------|----------|
| 047 | <b>Contents</b>                 |          |
| 048 |                                 |          |
| 049 | <b>1 MATLAB simulation code</b> | <b>3</b> |
| 050 |                                 |          |
| 051 | <b>2 Offline analysis</b>       | <b>6</b> |
| 052 |                                 |          |
| 053 | <b>3 Batch chromatography</b>   | <b>7</b> |
| 054 | 3.1 100% EtOH . . . . .         | 7        |
| 055 | 3.2 80% EtOH . . . . .          | 7        |
| 056 |                                 |          |
| 057 |                                 |          |
| 058 |                                 |          |
| 059 |                                 |          |
| 060 |                                 |          |
| 061 |                                 |          |
| 062 |                                 |          |
| 063 |                                 |          |
| 064 |                                 |          |
| 065 |                                 |          |
| 066 |                                 |          |
| 067 |                                 |          |
| 068 |                                 |          |
| 069 |                                 |          |
| 070 |                                 |          |
| 071 |                                 |          |
| 072 |                                 |          |
| 073 |                                 |          |
| 074 |                                 |          |
| 075 |                                 |          |
| 076 |                                 |          |
| 077 |                                 |          |
| 078 |                                 |          |
| 079 |                                 |          |
| 080 |                                 |          |
| 081 |                                 |          |
| 082 |                                 |          |
| 083 |                                 |          |
| 084 |                                 |          |
| 085 |                                 |          |
| 086 |                                 |          |
| 087 |                                 |          |
| 088 |                                 |          |
| 089 |                                 |          |
| 090 |                                 |          |
| 091 |                                 |          |
| 092 |                                 |          |

# 1 MATLAB simulation code

A schematic representation of all the stages needed for the complete method development is reported in Fig. 1.

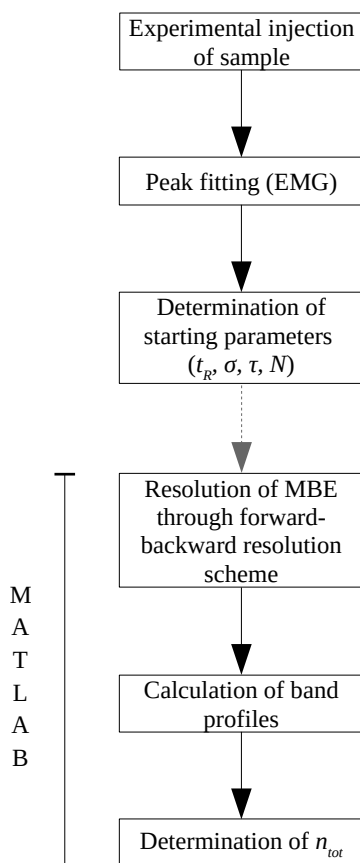

**Fig. 1:** Schematic representation of the method development steps.

More in detail, the parameters needed for the theoretical prediction of band profiles are: retention time ( $t_R$ ), standard deviation ( $\sigma$ ), time constant of exponential decay function ( $\tau$ ) and plate number ( $N$ ). They have been obtained by fitting experimental peaks with an EMG function (see main text for details). As an example, the result of peak fitting applied to the *Cannabis* extract is reported in Fig. 2.

139  
140  
141  
142  
143  
144  
145  
146  
147  
148  
149  
150  
151  
152  
153  
154  
155  
156  
157  
158  
159  
160  
161  
162  
163  
164  
165  
166  
167  
168  
169  
170  
171  
172  
173  
174  
175  
176  
177  
178  
179  
180  
181  
182  
183  
184

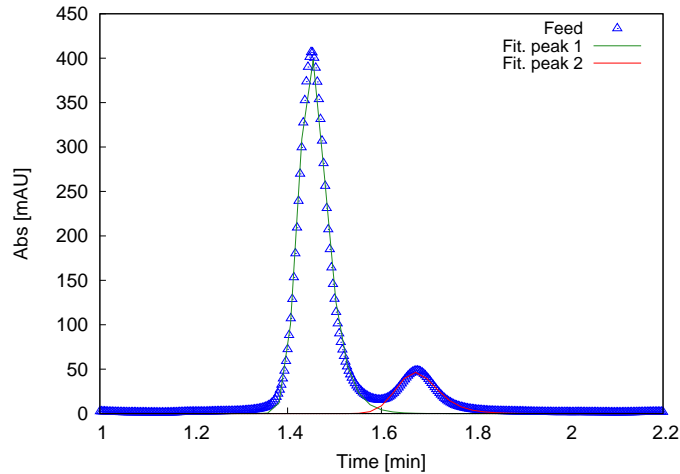

**Fig. 2:** Peak fitting with EMG function applied to *Cannabis* extract. First peak: CBD, second peak: CBC and THC.

Then a MATLAB code has been used for the calculation of band profiles in recycling chromatography, based on the number of column passages ( $n$ ), using a forward-backward differences scheme for obtaining numerical solutions of the Equilibrium-Dispersive (ED) Model of chromatography [1] (see main text for details). Results are reported in Fig. 3 for  $n=5$  that corresponds to a number of switches  $n_s=3$ , since 2 columns are used. If the recycling process is performed on one column, only  $n=4$  column passages are allowed in order to avoid the “re-mixing” of the two peaks. Otherwise, the use of APR (two columns) allows one more passage through column. Indeed, the two columns are connected in series, so what elutes from upstream column is directly injected into downstream column, without any switch, before leaving the system.

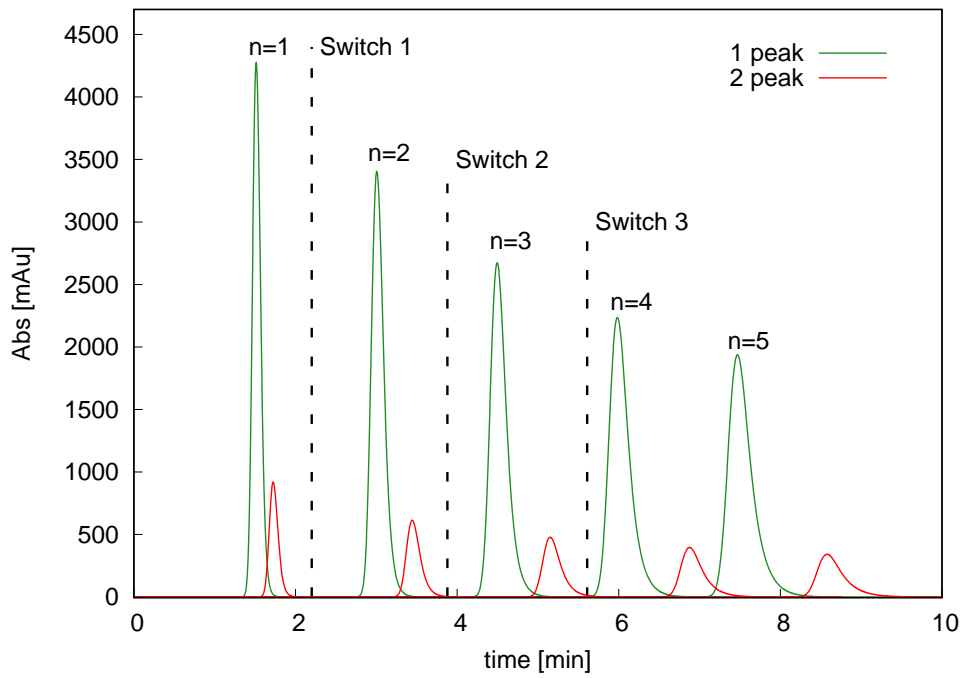

**Fig. 3:** Theoretical prediction of band profiles using MATLAB code for  $n=5$ .

185  
186  
187  
188  
189  
190  
191  
192  
193  
194  
195  
196  
197  
198  
199  
200  
201  
202  
203  
204  
205  
206  
207  
208  
209  
210  
211  
212  
213  
214  
215  
216  
217  
218  
219  
220  
221  
222  
223  
224  
225  
226  
227  
228  
229  
230

231 **2 Offline analysis**

232

233 Fig. 4 shows offline analysis of recycling fractions using analytical method described  
234 in [5]. See Fig. 4 of the main text for the identification of the two fractions.

235

236

237

238

239

240

241

242

243

244

245

246

247

248

249

250

251

252

253

254

255

256

257

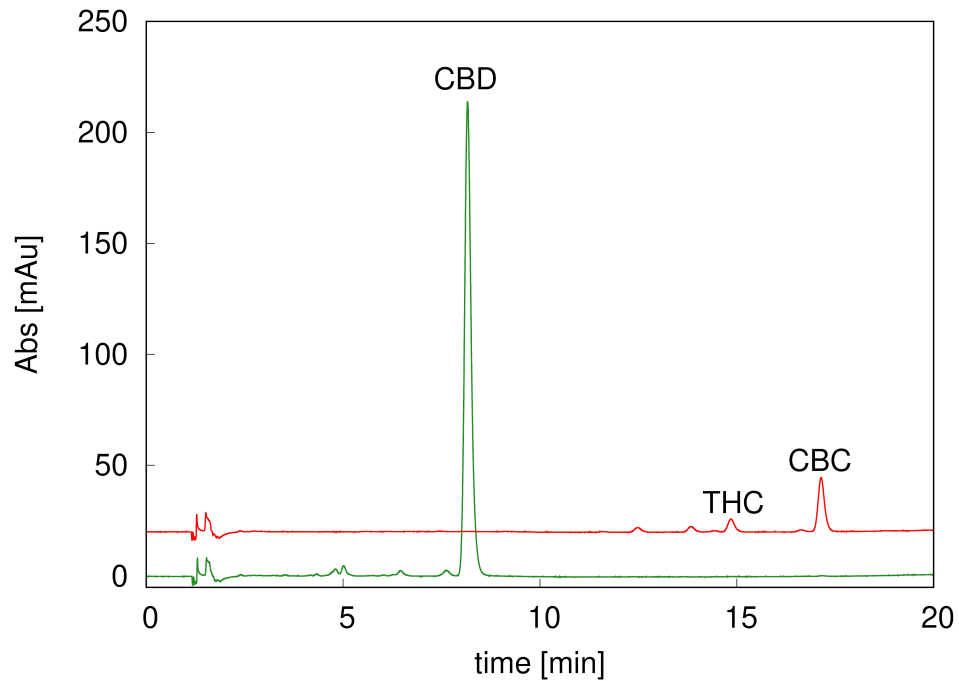

258 **Fig. 4:** Offline analysis of recycling fractions. In green the chromatogram of first  
259 fraction and in red the chromatogram of second fraction.

260

261

262

263

264

265

266

267

268

269

270

271

272

273

274

275

276

### 3 Batch chromatography

#### 3.1 100% EtOH

Fig. 5 shows a batch chromatogram obtained by injecting 20  $\mu\text{L}$  of *Cannabis* sample in a C18 150 $\times$ 8 mm column using 100% ethanol as mobile phase.

The fractions collected from the batch were analyzed offline using analytical method reported in [5]. Then, purity, recovery, productivity and solvent consumption have been calculated for cases B and C reported in Table 2 of the main text.

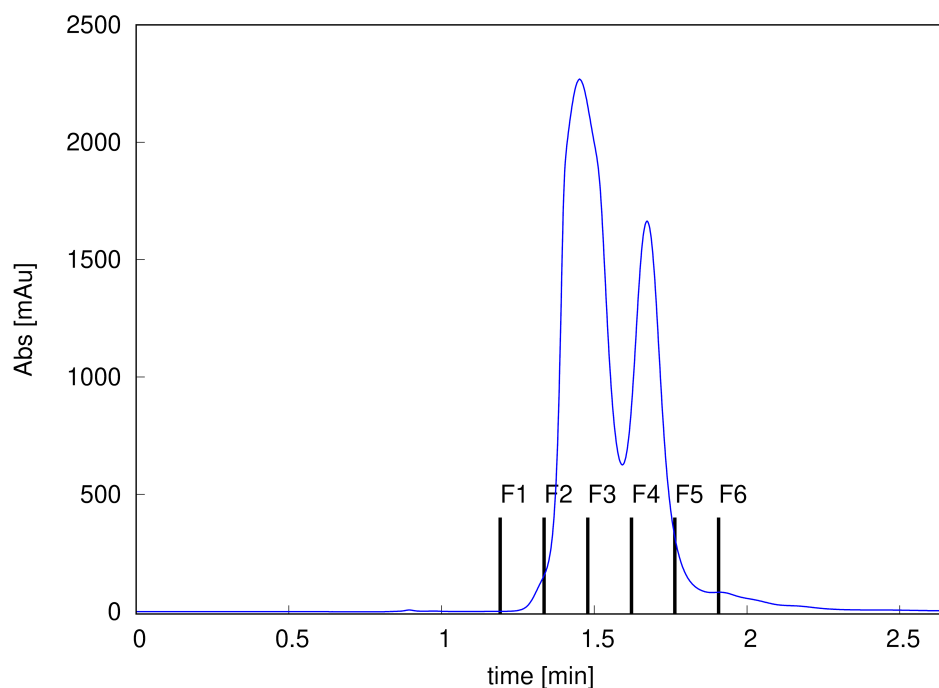

**Fig. 5:** Batch chromatogram of 20  $\mu\text{L}$  injection of *Cannabis* sample using 100 % ethanol as mobile phase.. Collected fractions are indicated with increasing numbers (F1-F6).

#### 3.2 80% EtOH

Fig. 6 shows a batch chromatogram obtained by injecting 20  $\mu\text{L}$  of *Cannabis* sample in a C18 150 $\times$ 8 mm column using 80/20 % ethanol/water as mobile phase to obtain the baseline separation between the peaks of CBD and THC.

The CBD peak has been collected and purity, recovery, productivity and solvent consumption have been calculated for case E in Table 2 of the main text.

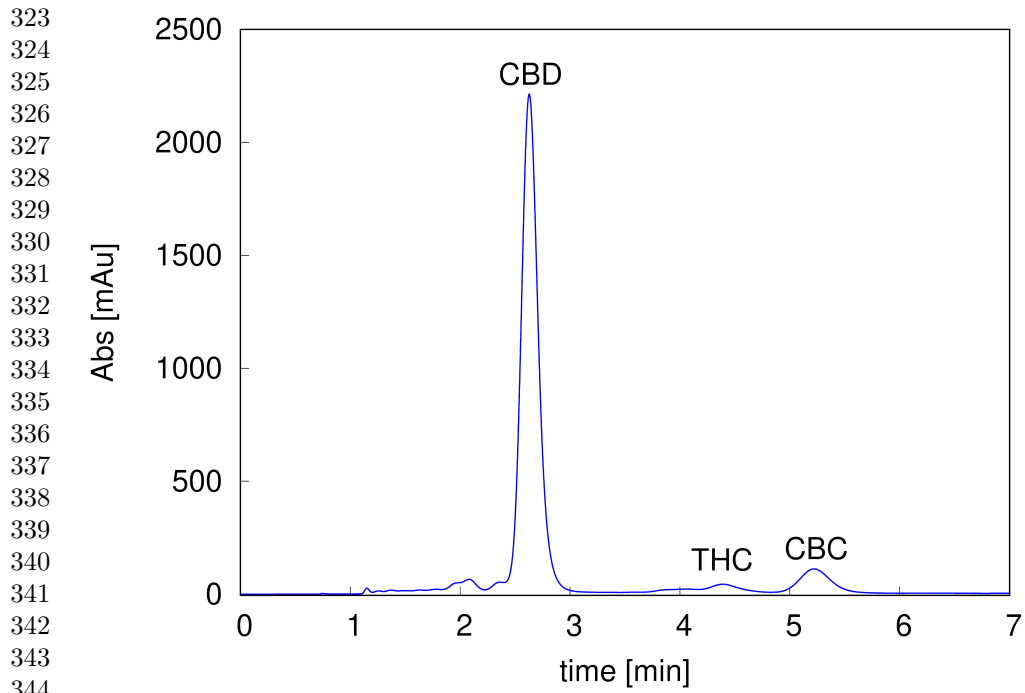

345 **Fig. 6:** Batch chromatogram of 20  $\mu\text{L}$  injection of *Cannabis* sample using 80/20 %  
346 ethanol/water as mobile phase.

347  
348  
349  
350  
351  
352  
353  
354  
355  
356  
357  
358  
359  
360  
361  
362  
363  
364  
365  
366  
367  
368



|                                                                                                                                                                                                        |     |
|--------------------------------------------------------------------------------------------------------------------------------------------------------------------------------------------------------|-----|
| <b>References</b>                                                                                                                                                                                      | 369 |
| [1] G. Guiochon, A. Felinger, A. Katti, D. Shirazi, <i>Fundamentals of Preparative and Nonlinear Chromatography</i> , 2nd Edition, Academic Press, Boston, MA, 2006.                                   | 370 |
|                                                                                                                                                                                                        | 371 |
|                                                                                                                                                                                                        | 372 |
|                                                                                                                                                                                                        | 373 |
| [2] R. T. Maruyama, P. Karnal, T. Sainio, A. Rajendran, Design of bypass-simulated moving bed chromatography for reduced purity requirements, <i>Chem. Eng. Sci.</i> 205 (2019) 401–413                | 374 |
|                                                                                                                                                                                                        | 375 |
|                                                                                                                                                                                                        | 376 |
|                                                                                                                                                                                                        | 377 |
| [3] A. Rajendran, G. Paredes, M. Mazzotti, Simulated moving bed chromatography for the separation of enantiomers, <i>J. Chromatogr. A</i> 1216 (2009) 709–738                                          | 378 |
|                                                                                                                                                                                                        | 379 |
|                                                                                                                                                                                                        | 380 |
| [4] Q-L. He, S. Leweke, E. von Lieres, Efficient numerical simulation of simulated moving bed chromatography with a single-column solver, <i>Computers and Chemical Engineering</i> 111 (2018) 183–198 | 381 |
|                                                                                                                                                                                                        | 382 |
|                                                                                                                                                                                                        | 383 |
| [5] L. Loxterkamp, S. Stephan, K. Monks, (C)an(n)alyze: determination of 16 cannabinoids inside flowers, oils and seeds. (2019) Application note VPH0070, KNAUER Wissenschaftliche Geräte GmbH         | 384 |
|                                                                                                                                                                                                        | 385 |
|                                                                                                                                                                                                        | 386 |
|                                                                                                                                                                                                        | 387 |
|                                                                                                                                                                                                        | 388 |
|                                                                                                                                                                                                        | 389 |
|                                                                                                                                                                                                        | 390 |
|                                                                                                                                                                                                        | 391 |
|                                                                                                                                                                                                        | 392 |
|                                                                                                                                                                                                        | 393 |
|                                                                                                                                                                                                        | 394 |
|                                                                                                                                                                                                        | 395 |
|                                                                                                                                                                                                        | 396 |
|                                                                                                                                                                                                        | 397 |
|                                                                                                                                                                                                        | 398 |
|                                                                                                                                                                                                        | 399 |
|                                                                                                                                                                                                        | 400 |
|                                                                                                                                                                                                        | 401 |
|                                                                                                                                                                                                        | 402 |
|                                                                                                                                                                                                        | 403 |
|                                                                                                                                                                                                        | 404 |
|                                                                                                                                                                                                        | 405 |
|                                                                                                                                                                                                        | 406 |
|                                                                                                                                                                                                        | 407 |
|                                                                                                                                                                                                        | 408 |
|                                                                                                                                                                                                        | 409 |
|                                                                                                                                                                                                        | 410 |
|                                                                                                                                                                                                        | 411 |
|                                                                                                                                                                                                        | 412 |
|                                                                                                                                                                                                        | 413 |
|                                                                                                                                                                                                        | 414 |
